# Supplementary material
Source: publisher figshare collection journal article supplement (https://frontiersin.figshare.com/ndownloader/files/24754577)
Supplement: Supplementary file 1 [file 24754577]

## Sheet: Sheet1
Number	specimen	SEX	ARO	PENN	PES	LB	MF	MS	dp1	LCLCK
S700014	teeth	F	-	-	-	present	present	visible	-	-
S700015	teeth	M	-	-	-	-	-	-	-	-
S700017	skeleton	F	M2	P4	dp1	-	-	visible	present	complete
S700018	skeleton	M	M1	P4	-	-	-	invisible	present	reduced
SNGPM 00069	skull	M	M1	P3	dp1	-	-	visible	present	reduced
SNGPM 00068	skeleton	F	M1	-	dp1	-	-	invisible	present	reduced
STM 44-14	skeleton	M	M1	P3	p2	-	-	invisible	-	complete
STM 44-15	skeleton	M	-	-	p2	-	-	-	absent	reduced
STM 44-16	skeleton	F	-	-	dp1	-	-	-	present	-
STM 44-32	skeleton	F	M2	P4	-	present	absent	invisible	absent	reduced
STM 44-33	skeleton	M	M2	P4	-	-	-	-	absent	reduced
STM 44-34	skeleton	F	M2	P4	p2	present	-	-	-	reduced
STM 44-35	skeleton	M	-	-	-	-	-	-	present	-
STM 44-56	skeleton	F	M2	P4	-	-	-	-	present	-
STM 44-57	skeleton	F	M2	P4	-	-	-	-	absent	-
STM 44-58	skeleton	M	-	-	-	-	-	-	absent	-
STM 44-59	skeleton	M	-	-	-	-	-	-	absent	complete
STM 44-60	skeleton	M	M1	P4	p2	-	-	visible	present	reduced
STM 44-61	skeleton	M	M2	P4	-	-	-	invisible	present	reduced
STM 44-62	skeleton	F	M2	P4	-	-	-	-	absent	reduced
STM 44-66	skeleton	M	M2	P4	p2	present	absent	invisible	present	complete
STM 44-67	skull	-	-	-	-	present	present	-	-	-
STM 44-68	skull	F	M2	P4	p2	present	present	visible	present	complete
STM 44-69	skull	-	-	-	-	absent	present	-	-	-
STM 44-79	skeleton	M	M2	P4	p2	-	-	invisible	absent	reduced
STM 44-80	skeleton	M	M2	P4	p2	present	-	invisible	absent	complete
STM 44-81	skeleton	M	M2	P4	-	-	-	invisible	absent	reduced
STM 44-82	skeleton	M	-	P4	-	-	-	invisible	absent	reduced
STM 44-85	skeleton	F	M2	P4	dp1	-	-	invisible	absent	reduced
STM 44-88	skeleton	M	M1	p3	p2	-	-	-	-	reduced
STM 44-89	skeleton	F	M1	P3/P4	dp1	-	-	visible	present	complete
STM 44-90	skeleton	F	M2	P4	dp1	-	-	visible	absent	reduced
STM 44-93	skeleton	M	-	P4	-	-	-	invisible	absent	reduced
STM 44-94	skeleton	M	M2	P4	-	-	present	invisible	absent	complete
STM 44-95	skeleton	F	-	-	-	-	-	invisible	present	-
STM 44-96	skeleton	M	M2	P4	-	-	-	-	absent	reduced
STM 44-98	skeleton	M	M2	P4	-	-	-	invisible	-	reduced
STM 44-102	skeleton	M	M1	P3	p2	-	-	visible	absent	reduced
STM 44-103	skeleton	M	M1/M2	P4	-	-	-	visible	absent	reduced
STM 44-104	skeleton	M	M1	P4	p2	absent	present	invisible	absent	reduced
STM 44-106	skeleton	M	M1	-	-	-	-	-	present	-
STM 44-108	skeleton	F	M1	P4	dp1	absent	present	invisible	absent	reduced
STM 44-109	skeleton	M	M1	P3	p2	-	-	invisible	absent	reduced
STM 44-110	skeleton	F	M2	P4	dp1	-	-	invisible	absent	reduced
STM 44-111	skeleton	F	M1/M2	P4	dp1	-	-	visible	present	reduced
STM 44-112	skeleton	M	M1/M2	P4	dp1	present	present	visible	present	reduced
STM 44-115	skeleton	F	-	-	-	-	-	invisible	-	reduced
STM 44-119	skeleton	M	M1	P4	P2	-	-	invisible	present	reduced
STM 44-121	skeleton	F	M1	P3	p2	present	present	invisible	absent	reduced
STM 44-125	skeleton	F	-	-	p2	-	-	invisible	present	reduced
STM 44-126	skeleton	F	M2	P4	dp1	-	-	invisible	absent	reduced
STM 44-127	skeleton	M	M1	P3/P4	-	-	-	invisible	absent	reduced
